# Supplementary material for: Biodegradation of Single-Walled Carbon Nanotubes in Macrophages through Respiratory Burst Modulation
Source: MDPI journal article supplement (doi:10.3390/ijms17030409), 2016-03-22
Supplement: s1 [file s1]

# Supplementary Materials: Biodegradation of Single-Walled Carbon Nanotubes in Macrophages through Respiratory Burst Modulation

Jie Hou, Bin Wan, Yu Yang, Xiao-Min Ren, Liang-Hong Guo and Jing-Fu Liu

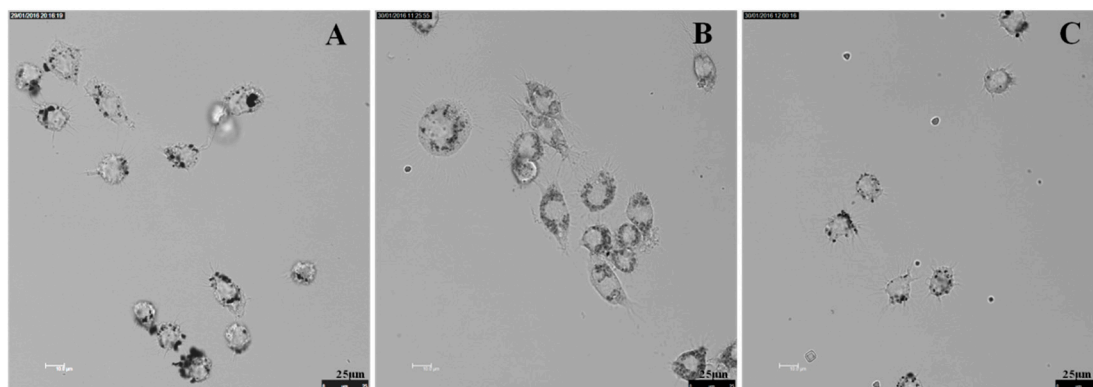

**Figure S1.** Bright-field images of the SWCNTs in macrophages demonstrate the internalization of CNTs within cells. (A) p-SWCNTs; (B) ox-SWCNTs; (C) OH-SWCNTs (5  $\mu\text{g/mL}$ , 6 h). Scale bar = 25  $\mu\text{m}$ .

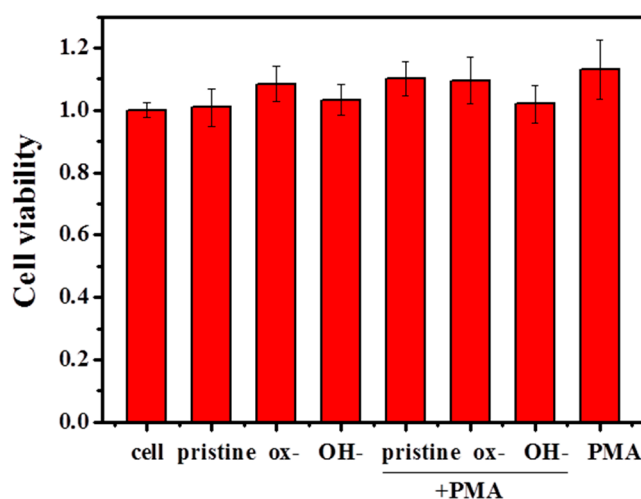

**Figure S2.** Viability of macrophages under 24 h exposures of different types of SWCNTs (pristine, ox- and OH-SWCNTs, 5  $\mu\text{g/mL}$ ) with or without PMA (0.5  $\mu\text{M}$ ) activation, as measured by WST-1 assay (Roche Applied Science, Bavaria, Germany). Cells were seeded on a 96-well plate and allowed to attach for overnight, after the treatment, 100  $\mu\text{L}$  of WST-1 work solution were added into each well and incubated for 2 h at 37  $^{\circ}\text{C}$ , followed by reading absorbance at 490 nm (690 nm for background subtraction).

**Table S1.** Characteristics (length and diameters) of the SWCNTs before biodegradation.

|          | Pristine SWCNT <sup>a</sup> | ox-SWCNTs <sup>b</sup> | OH-SWCNTs <sup>a</sup> |
|----------|-----------------------------|------------------------|------------------------|
| Length   | 5–30 $\mu\text{m}$          | 630 $\pm$ 47 nm        | 5–30 $\mu\text{m}$     |
| Diameter | 1–2 nm                      | 1–2 nm                 | 1–2 nm                 |

<sup>a</sup> Data from supplier (Chengdu Organic Chemicals Co., Ltd., Chinese Academy of Sciences, Chengdu, China); <sup>b</sup> ox-SWCNTs were prepared by acid-oxidation of the pristine SWCNTs, and the diameter and length were measured by analyzing 100 individual CNTs in representative TEM images.
